# Supplementary material for: Fabrication of oxygen vacancy-rich BiO2−x/multi-walled carbon nanotubes with enhanced photothermal catalytic antibacterial performance
Source: Royal Society of Chemistry journal article supplement (doi:10.1039/d4cy00528g), 2024-01-01
Supplement: d4cy00528g1.pdf [file d4cy00528g1.pdf]

## Supplementary Information

### Text S1. Chemicals and Reagents

Ulfuric acid ( $\text{H}_2\text{SO}_4$ , 98%), Sodium hydroxide ( $\text{NaOH}$ ,  $\geq 96\%$ ), Ethanol ( $\geq 95\%$ ), Methanol( $\geq 99.0\%$ ), Isopropanol ( $\geq 99\%$ ), 4-Hydroxy-2,2,6,6-tetramethylpiperidinyloxy free radical (TEMPO, 98%), Furfuryl alcohol (FFA,  $\geq 99\%$ ) Sodium chloride ( $\text{NaCl}$ ,  $\geq 99\%$ ), Potassium chloride ( $\text{KCl}$ ,  $\geq 99\%$ ), Disodium hydrogen phosphate ( $\text{Na}_2\text{HPO}_4$ ,  $\geq 99\%$ ), Potassium dihydrogen phosphate ( $\text{KH}_2\text{PO}_4$ ,  $\geq 99\%$ ), Humic acid (HA,  $\geq 99\%$ ), Agar-agar powder (99%) and Yeast extract (99%) were purchased from Sinopharm Chemical Reagent Co., Ltd (Shanghai, China). Sodium bismuthate dehydrate ( $\text{NaBiO}_3 \cdot 2\text{H}_2\text{O}$ ,  $\geq 80\%$ ) and Gmultiwalled carbon nanotube were purchased from Sigma Aldrich Co., Ltd. The *Escherichia coli K-12* (*E. coli K-12*) was purchased from the American Type Culture Collection, which was chosen as the object of disinfection. The distilled water was used in all experiments. All materials and reagents were used directly without further purification.

### Text S2. Antibacterial experiment

Preparation of LB liquid medium: Weigh 2 g of  $\text{NaCl}$ , 2 g of peptone and 1 g of yeast powder, add 200 mL of ultra-pure water, seal with aseptic sealing film, sterilize in 121 °C high temperature sterilization pot for 20 min, and then put in a super clean table for use.

Preparation of PBS buffer: Dissolve 8 g  $\text{NaCl}$ , 0.2 g  $\text{KCl}$ , 1.42 g  $\text{Na}_2\text{HPO}_4$  and 0.27 g  $\text{KH}_2\text{PO}_4$  in 1000 mL ultra-pure water, and after completely dissolving, sterilize them in 121 °C high temperature sterilization pot for 20 min for future use.

Preparation of solid AGAR medium: Weigh 8 g  $\text{NaCl}$ , 8 g peptone, 4 g yeast powder, 12 g solid AGAR powder, add 800 mL ultra-pure water, seal with aseptic sealing film, sterilize in 121 °C high temperature sterilization pot for 20 min, pour them into a disposable sterile petri dish (90 mm) in an ultra-clean table to cool for use.

### **Text S3. Characterization of photocatalysts**

Scanning electron microscopy (SEM) measurements were performed on the ZEISS Sigma 300 emission SEM in Germany. Transmission electron microscopy (TEM) instrument model for the FEI FEITecnaig2F20, accelerating voltage of 200 kV. Fourier infrared spectrometer (FT-IR, Thermo Scientific™ Nicolet™ FTIR spectrometer) was used to study the molecular structure and chemical composition of substances, with a scanning rate of  $4\text{ cm}^{-1}\cdot\text{min}^{-1}$  and a scanning range of  $500\sim 4000\text{ cm}^{-1}$ . The compositions and valence states of the catalysts were analyzed by X-ray photoelectron spectroscopy (XPS, PHI 5000 Versaprobe type III). The light absorption performance of the catalyst was investigated by ultraviolet visible near-infrared spectrophotometer (UV-Vis, Shimadzu, Japan, range: 200-3000 nm). Electrochemical workstation (Shanghai Chenhua CHI 660E) was used to test the photocurrent response and electrochemical impedance of the catalyst. Electron paramagnetic resonance (EPR) spectroscopy was performed with Bruker EMX plus spectrometer to detect free radicals in the material. The fluorescence spectrometer (PL, Edinburgh FLS1000, Britain) was used to record the photoluminescence spectra at the 340 nm excitation wavelength. The zeta-potentials of catalyst were evaluated by the Zeta potential analyzer (Nano ZS90, Britain).

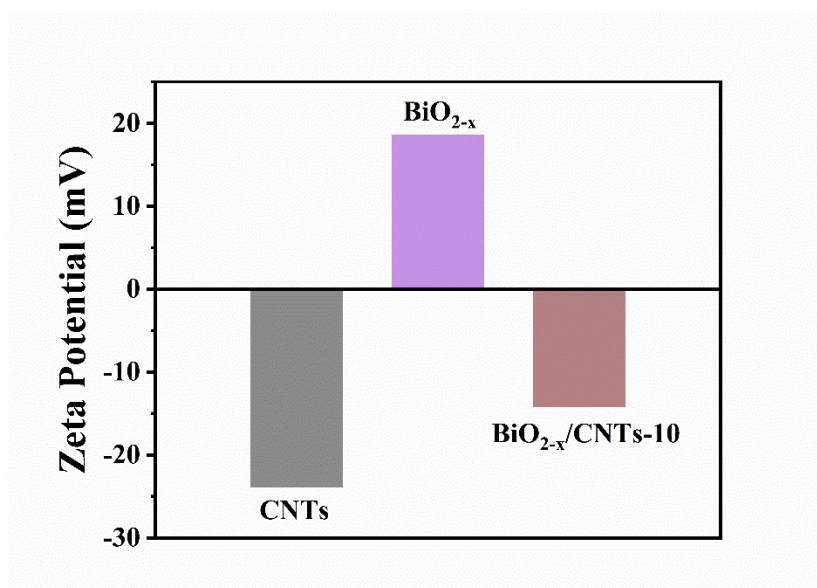

Fig. S1 Zeta potentials of CNTs、BiO<sub>2-x</sub> and BiO<sub>2-x</sub>/CNTs-10

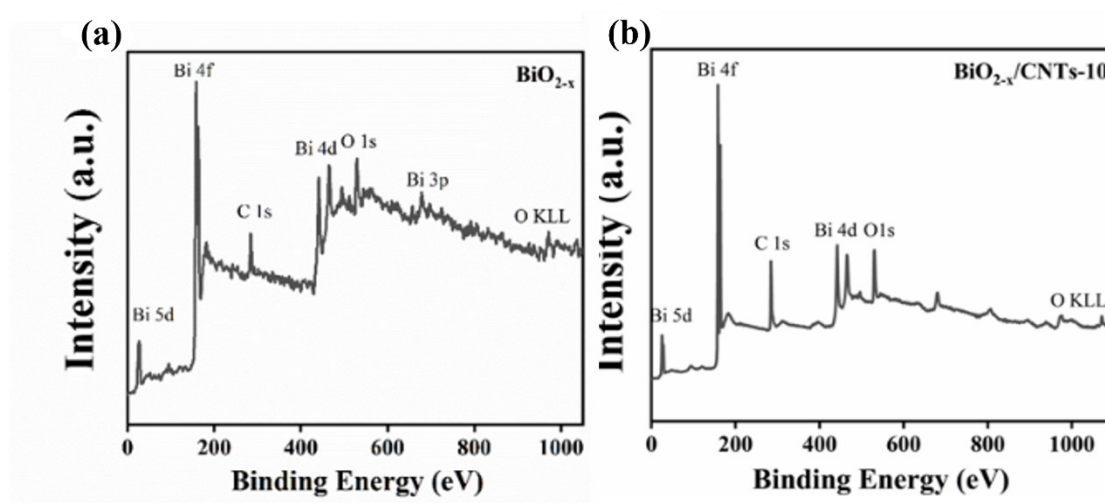

Fig. S2 XPS survey spectra of (a) BiO<sub>2-x</sub> and (b) BiO<sub>2-x</sub>/CNTs-10

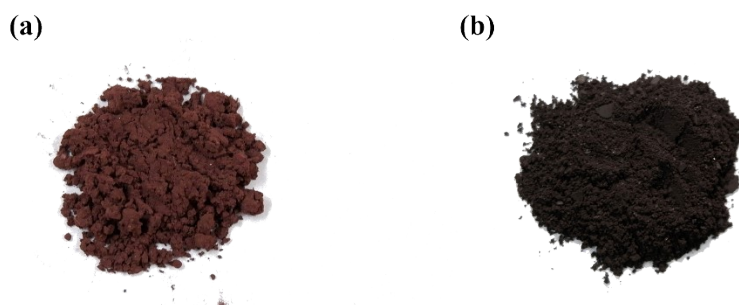

Fig. S3 Color of (a) BiO<sub>2-x</sub>; (b) BiO<sub>2-x</sub>/CNTs-10

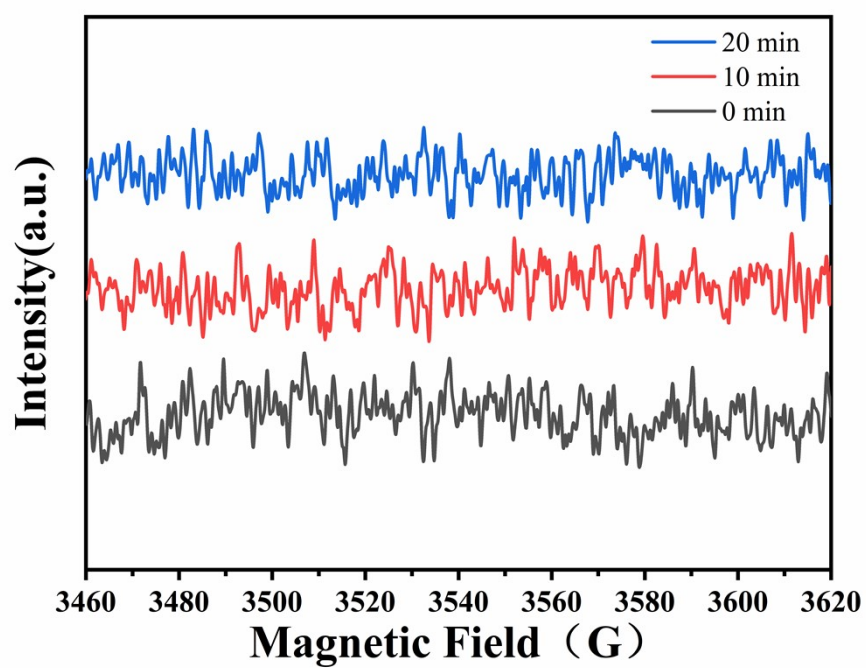

Fig. S4 EPR spectra of  $\cdot\text{OH}$  under near-infrared light

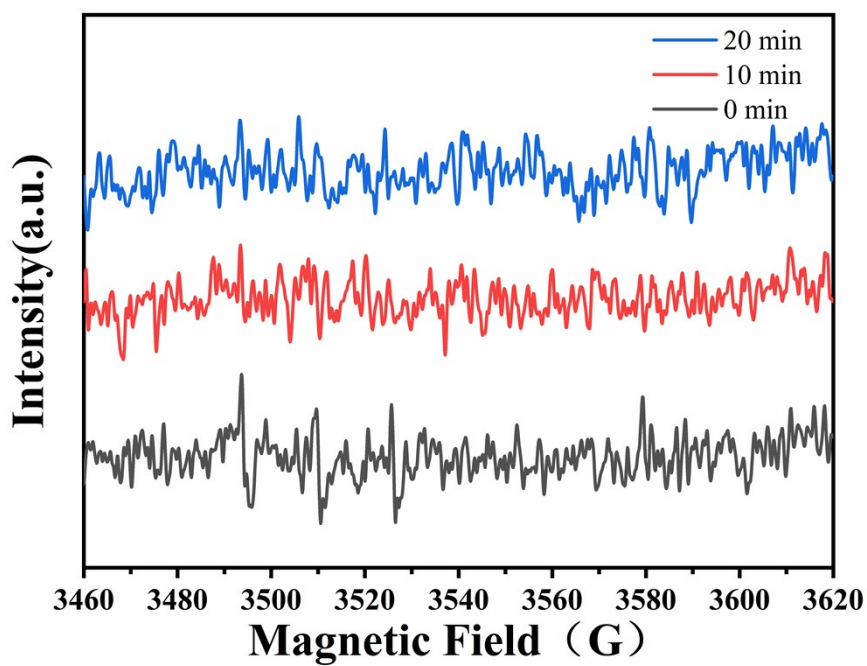

Fig. S5 EPR spectra of  $^1\text{O}_2$  under near-infrared light

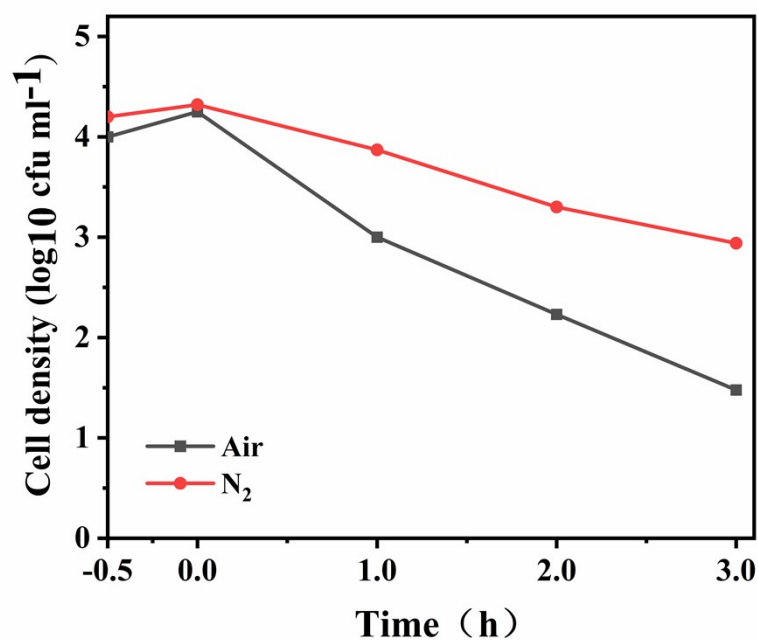

Fig. S6 Antibacterial effect of *E. coli* K-12 on different materials in N<sub>2</sub> and air

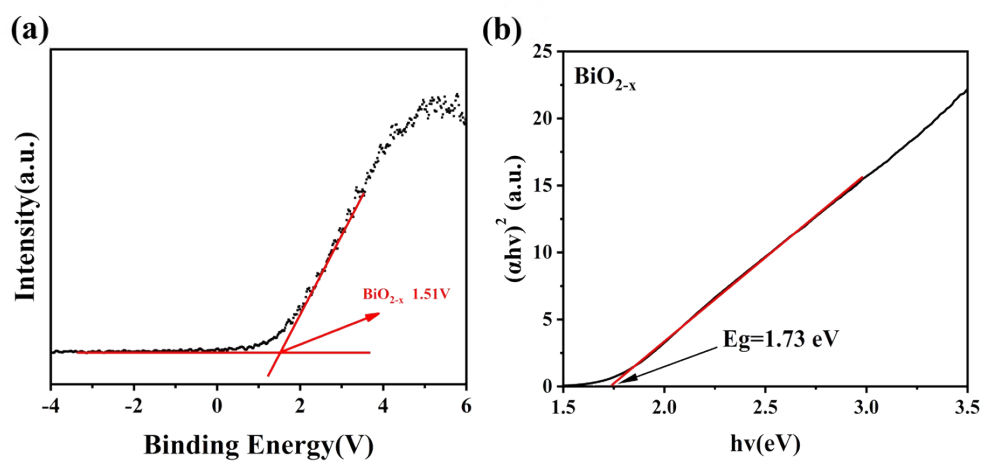

Fig.S7 (a) Valence band XPS spectra of BiO<sub>2-x</sub>; (b) band gap of BiO<sub>2-x</sub>
